# Supplementary material
Source: PubMed Central journal article supplement (PMC3668560)
Supplement: NIHMS472412-supplement-Supplemental_Data.pdf [file NIHMS472412-supplement-Supplemental_Data.pdf]

**Supplementary Material to Franks, Campbell et al.  
 “Methicillin-resistant *Staphylococcus aureus*-induced  
 thrombo-inflammatory response is reduced with timely  
 antibiotic administration” (Thromb Haemost 2013; 109.4)**

Table 1: Early antibiotic administration inhibits MSSA induced thrombin generation.

| Time (hrs)                                                                                                                  | -                 |                   | 0                 |                   | 6                 |                   | 12                |                   |
|-----------------------------------------------------------------------------------------------------------------------------|-------------------|-------------------|-------------------|-------------------|-------------------|-------------------|-------------------|-------------------|
| Antibiotic                                                                                                                  | -                 |                   | VANC              | LZ                | VANC              | LZ                | VANC              | LZ                |
| MSSA                                                                                                                        | -                 | +                 | +                 | +                 | +                 | +                 | +                 | +                 |
| <b>Lag (min)</b>                                                                                                            | 18.5 ±<br>2.5     | 6.7 ±<br>1.2*     | 16.0 ±<br>1**     | 15.5 ±<br>1.9**   | 15.3 ±<br>0.9**   | 15.7 ±<br>0.9**   | 12.7 ±<br>2.4     | 11.7 ±<br>1.3     |
| <b>Peak (nM)</b>                                                                                                            | 212.1 ±<br>44.5   | 325.2 ±<br>43.9   | 246.1 ±<br>30     | 247.9 ±<br>49.1   | 220.8 ±<br>36.1   | 224.8 ±<br>39     | 236.5 ±<br>47.8   | 269.2 ±<br>22.2   |
| <b>Time to Peak (min)</b>                                                                                                   | 29.3 ±<br>4.7     | 10.7 ±<br>1.8*    | 25.0 ± 2          | 24.3 ± 4          | 24.2 ±<br>2.1     | 24.3 ±<br>2.2     | 20.7 ±<br>3.8     | 18.7 ±<br>1.7     |
| <b>Rate (nM/min)</b>                                                                                                        | 27.0 ±<br>13.1    | 89.0 ±<br>22.5    | 29.3 ±<br>7.2     | 37.4 ±<br>18.8    | 27.4 ±<br>8.3     | 30.4 ±<br>9.5     | 34.9 ±<br>14.3    | 39.1 ±<br>3.3     |
| <b>AUC (nM*min)</b>                                                                                                         | 2570.6 ±<br>434.4 | 3165.6 ±<br>446.7 | 2733.0 ±<br>411.7 | 2624.6 ±<br>405.6 | 2765.8 ±<br>448.6 | 2637.3 ±<br>452.1 | 2866.6 ±<br>466.9 | 3112.4 ±<br>419.2 |
| LZ: linezolid, VANC: vancomycin. *p<0.05 vs. no <i>S. aureus</i> . **p<0.05 vs. <i>S. aureus</i> alone without antibiotics. |                   |                   |                   |                   |                   |                   |                   |                   |

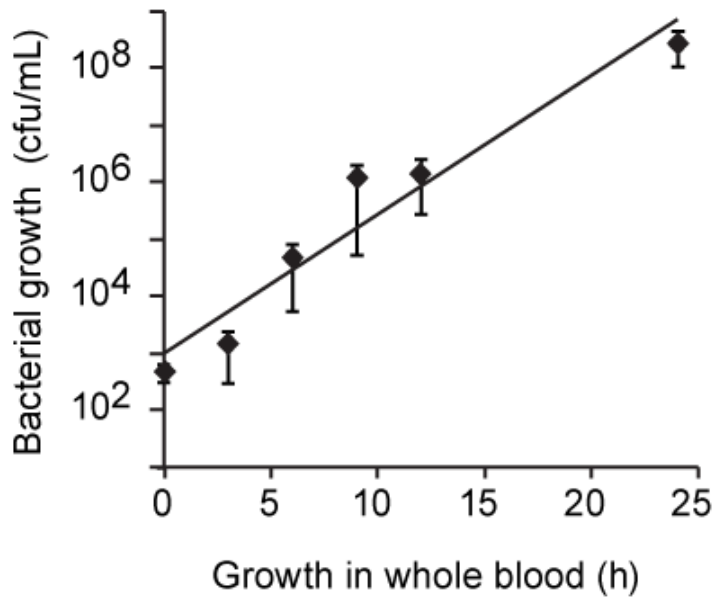

Supplement Figure 1

**Suppl. Figure 1: Bacterial growth in whole blood occurs in logarithmic phase.** Bacteria ( $9 \times 10^2$  cfu/mL, initial) were grown in whole blood for indicated amount of time and plated on blood agar and incubated overnight at 37°C. Bacterial cfu were counted. MRSA bacterial growth is represented by  $\log_{10}$  units on the vertical axis. The data reflect the mean ( $\pm$ SEM) of 3-5 experiments.

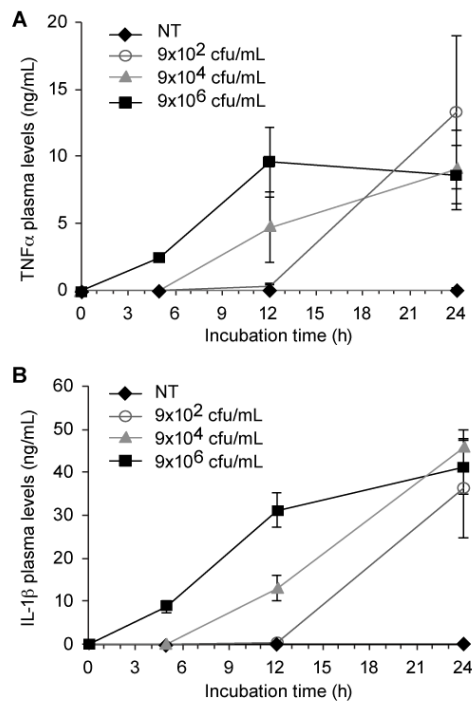

Supplement Figure 2

**Suppl. Figure 2: MRSA induces the release of TNF- $\alpha$  and IL-1 $\beta$  in whole blood.** MRSA was grown overnight and then inoculated in two mL of whole blood at a starting concentration of  $9 \times 10^2$ ,  $9 \times 10^4$ ,  $9 \times 10^6$  cfu/mL, or not treated (NT). Whole blood inoculated with MRSA was incubated at 37°C for 24

hours and plasma levels of each cytokine were measured over time by ELISA. Each point reflects the mean ( $\pm$ SEM) of 3-5 experiments.

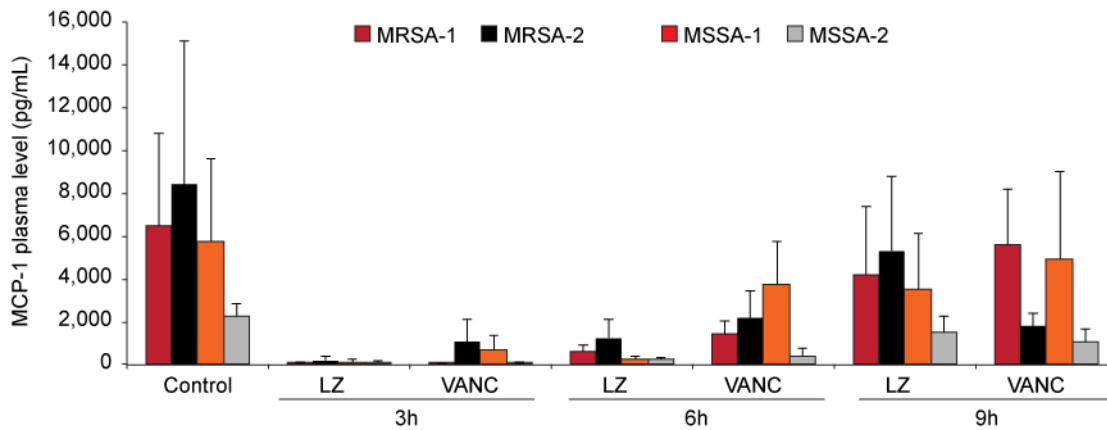

Supplement Figure 3

**Suppl. Figure 3: MRSA and MSSA strains induce similar cytokine responses in whole blood .** Two unique MRSA and two unique MSSA strains were grown overnight and then inoculated in 2 mL of whole blood at a starting concentration of  $9 \times 10^2$  cfu/mL. Bacteria were incubated at 37°C in 5% CO<sub>2</sub> for 24 hours. Plasma levels of IL-6, IL-8, and MCP-1 were measured at 24 hours. The left bars reflect the amount of MCP-1 produced during 24 hours of inoculation with MRSA and MSSA strains in the absence of any antibiotics. In additional experiments, linezolid (LZ, 5 µg/mL final concentration) or vancomycin (VANC, 5 µg/mL final concentration) were added 3, 6, and 9 hours after the inoculation was begun and cytokine synthesis was measured. Notice each strain produces a highly variable response. However, early antibiotic treatment reduces cytokine response compared to late administration regardless of strain of bacteria. Each point reflects the mean ( $\pm$ SEM) of 3 experiments.

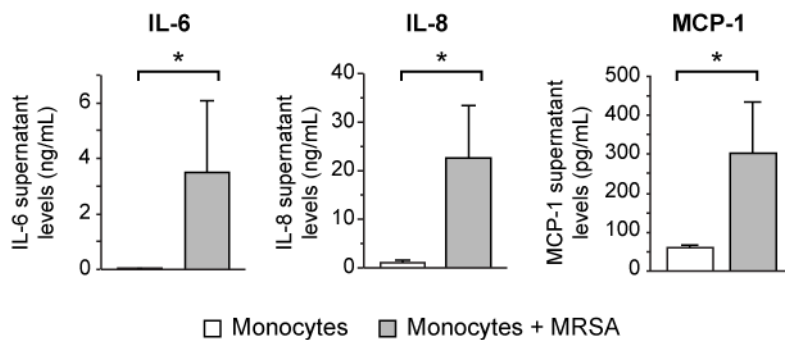

Supplement Figure 4

**Suppl. Figure 4: MRSA induces cytokine synthesis in isolated monocytes.** MRSA was grown overnight and then inoculated with freshly isolated monocytes ( $2 \times 10^6$ /mL) at a concentration of  $9 \times 10^2$  colony cfu/mL. MRSA-induced IL-6, IL-8, and MCP-1 synthesis by isolated monocytes was measured using ELISA. These data are representative of  $\geq 3$  individual experiments. (\* $p < 0.05$  compared to NT.)

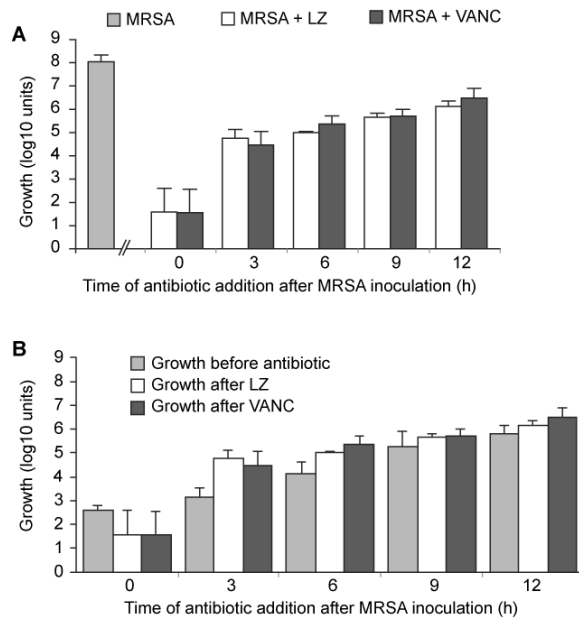

Supplement Figure 5

**Suppl. Figure 5: Antibiotics concentrations were bacteriostatic in whole blood.** Bacteria were grown in whole blood for indicated amount of time and plated on blood agar and incubated overnight at 37°C. Bacterial cfu were counted. Bacterial growth is represented by log<sub>10</sub> units on the vertical axis (A). In some experiments, linezolid (LZ, 5 µg/mL) or vancomycin (VANC, 5 µg/mL) were added at indicated times to determine the effect on growth. The far left bar (MRSA Control) reflects

bacterial growth after 24 hours of inoculation with MRSA in the absence of any antibiotics. These data reflect the mean ( $\pm$ SEM) of 3-5 experiments. In some experiments, as described above and at indicated times, bacteria were counted and antibiotics were added to determine if further growth occurred after addition of antibiotics (B).



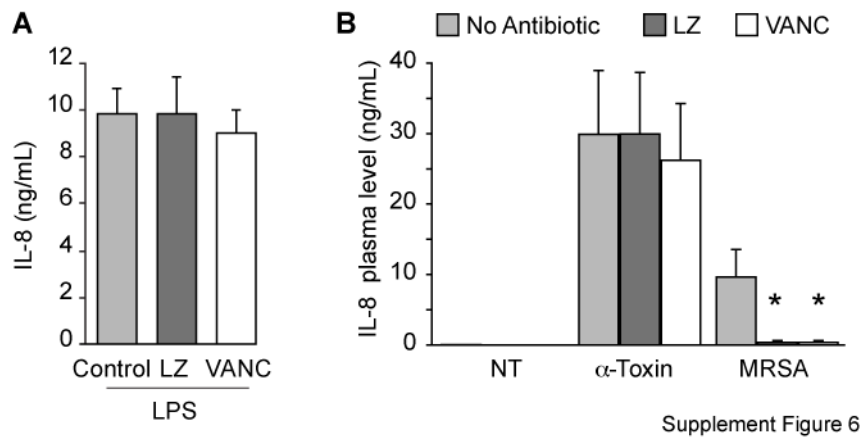

**Suppl. Figure 6: Antibiotics do not inhibit LPS or alpha-toxin induced synthesis of IL-8.** MRSA ( $9 \times 10^2$  cfu/mL bacteria) and LPS (100 ng/mL final concentration) (A) or alpha toxin (2  $\mu$ g/mL final concentration) (B) were incubated in 2 mL of whole blood for 24 hours in the presence of linezolid (LZ, 5  $\mu$ g/mL final concentration) or vancomycin (VANC, 5  $\mu$ g/mL final concentration). Plasma levels of IL-8 were measured using ELISA. Each point reflects the mean ( $\pm$ SEM) of 3-5 experiments (\* $p < 0.05$  versus MRSA without antibiotics).

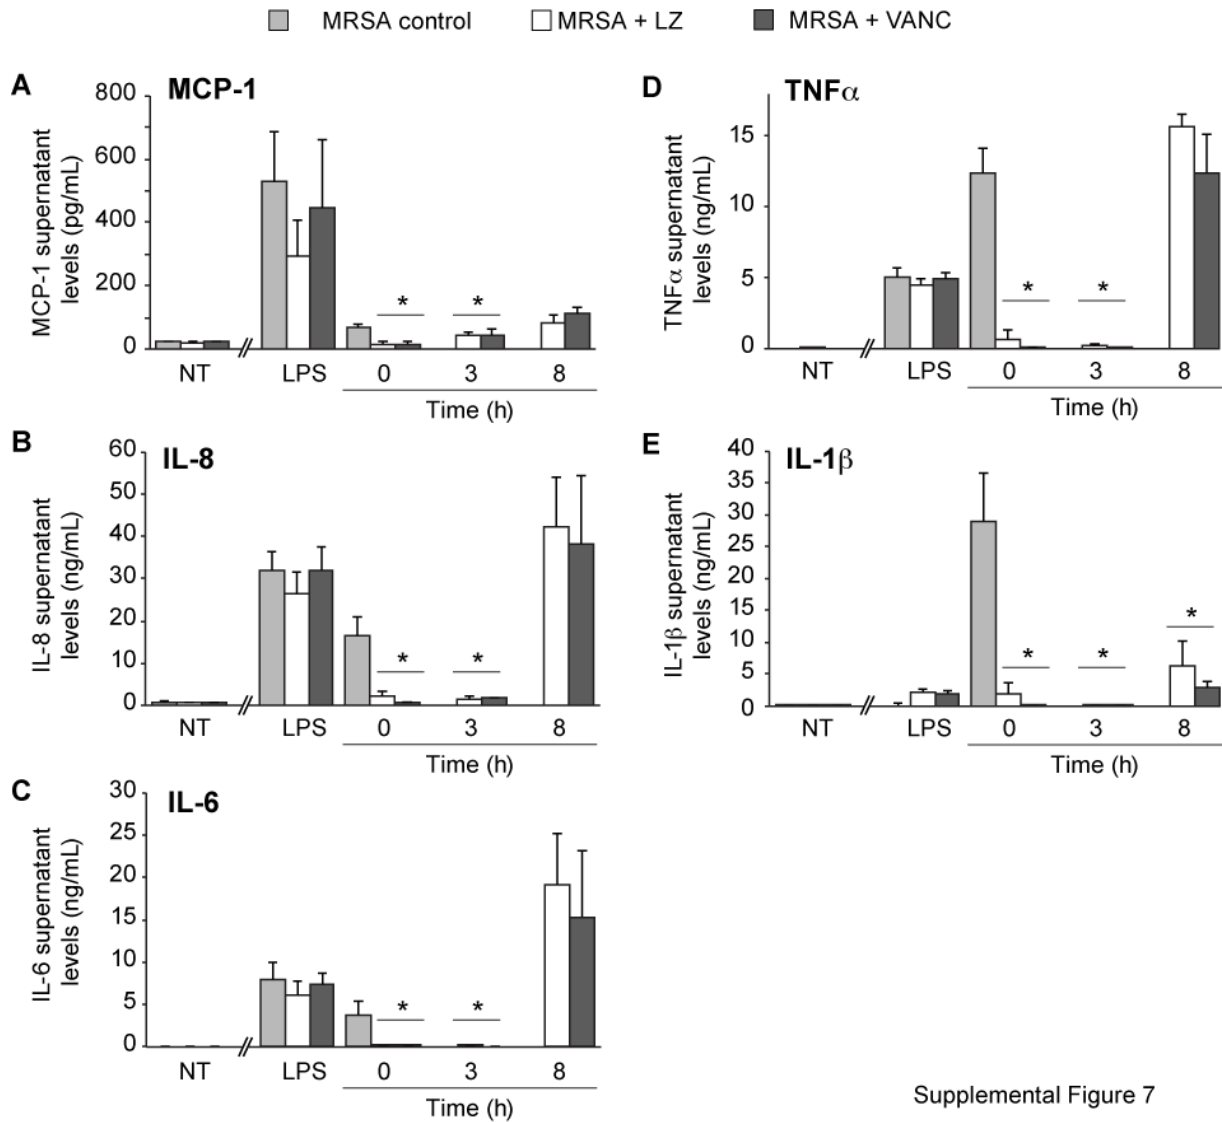

Supplemental Figure 7

**Suppl. Figure 7: Antibiotics reduce cytokine synthesis in MRSA-treated purified monocytes.**

Monocytes were purified as described in material and methods and incubated with LPS (100 ng/mL) or MRSA ( $9 \times 10^2$  cfu/mL) for 24 hours. At indicated time after treatment of LPS or MRSA, linezolid (LZ, 5  $\mu$ g/mL) or vancomycin (VANC, 5  $\mu$ g/mL) were added. Early addition of antibiotics reduces MCP-1 (A), IL-8 (B), IL-6 (C), TNF- $\alpha$  (D), and IL-1 $\beta$  (E), while later administration has little effect on cytokine production. Antibiotics had no effect on LPS-induced cytokine synthesis. The data reflect the mean ( $\pm$ SEM) of 3 experiments (\* $p < 0.05$  versus MRSA without antibiotics).

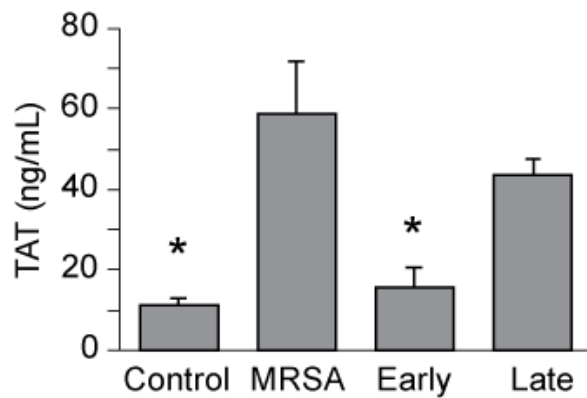

Supplement Figure 8

**Suppl. Figure 8: Early antibiotic administration reduces TAT levels after MRSA infection in mice.**

C57BL/6 mice (weighing 20–25 g) were randomly assigned to one of four groups: (1) control intravenous (i.v.) saline injection (PBS 100  $\mu$ L) (2) MRSA i.v. injection ( $3.3 \times 10^6$  total bacteria) (3) MRSA i.v. injection ( $3.3 \times 10^6$  total bacteria) followed by i.v. vancomycin injections (60 mg/kg) at three hours post infection (4) MRSA i.v. injection ( $3.3 \times 10^6$  total bacteria) followed by vancomycin i.v. injections (60 mg/kg) at nine hours post infection. Twenty-four hours after infection, mice were anesthetized with avertin and blood drawn into ACD through the carotid artery. TAT measurements were performed using an ELISA. Early vancomycin administration significantly reduced TAT levels compared to late administration. The data reflect the mean ( $\pm$ SEM) of 3-4 mice per group (\* $p < 0.05$  compared to control)
